# Supplementary material for: Exploring the role of acylated ghrelin and gut microbiome in delineating cognitive health in the elderly
Source: publisher site journal article supplement (doi:10.18632/aging.206200), 2025-02-07
Supplement: Supplementary file [file aging-vnull-206200-supplementary-material-SD1.pdf]

SUPPLEMENTARY FIGURES

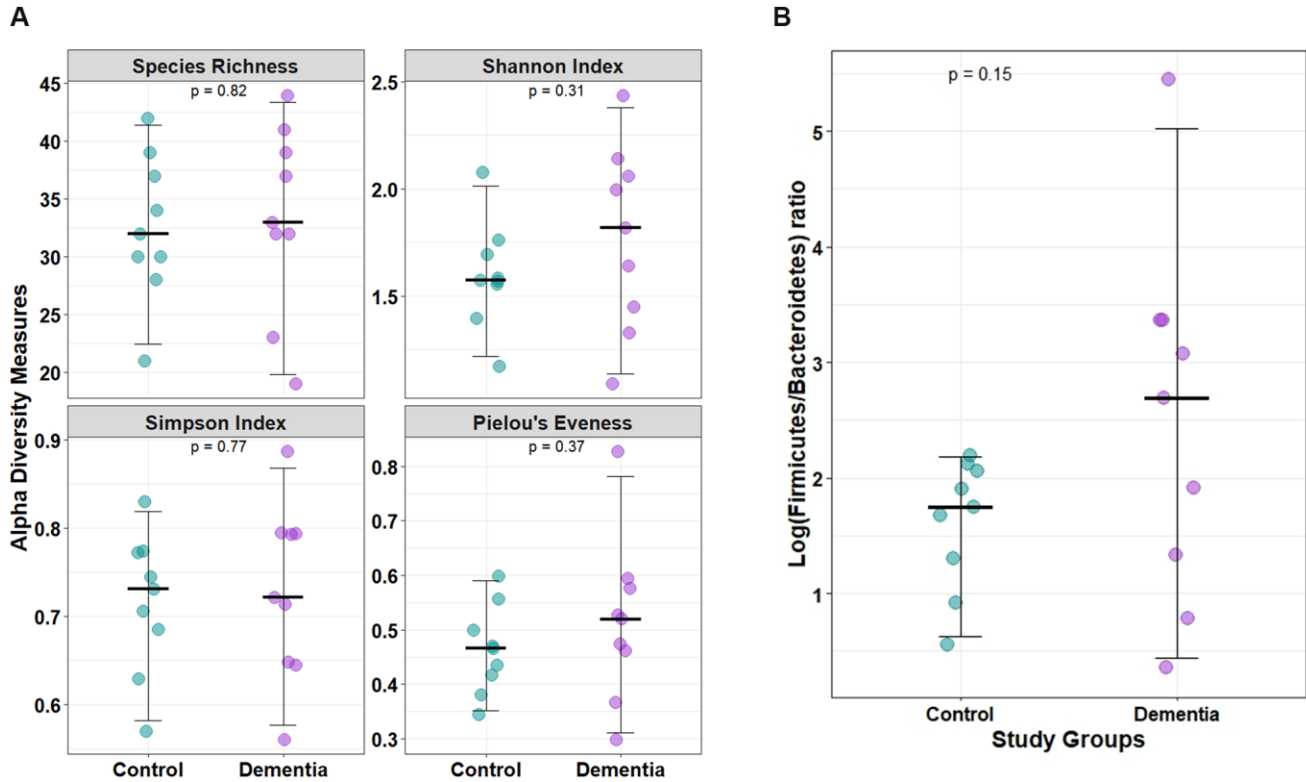

Supplementary Figure 1. (A) Alpha diversity comparison between dementia and control group. (B) Log transformed Firmicutes/Bacteroidetes ratio comparison between dementia and control group.

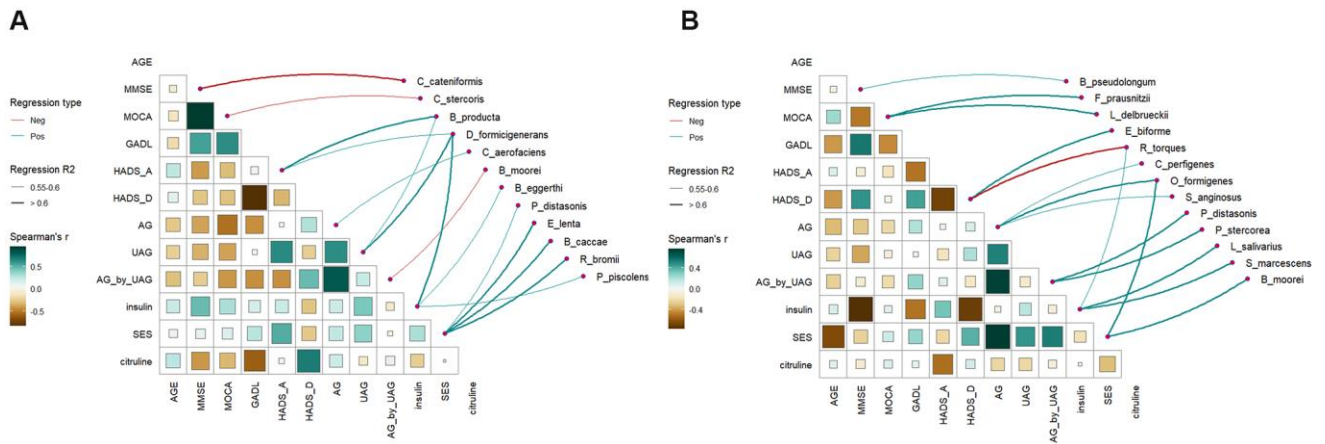

Supplementary Figure 2. Regression between species and clinical parameters. (A) Dementia Group, (B) Control Group. Red lines show a negative association, and green lines show a positive association. Thicker lines show  $r^2 > 0.6$ .

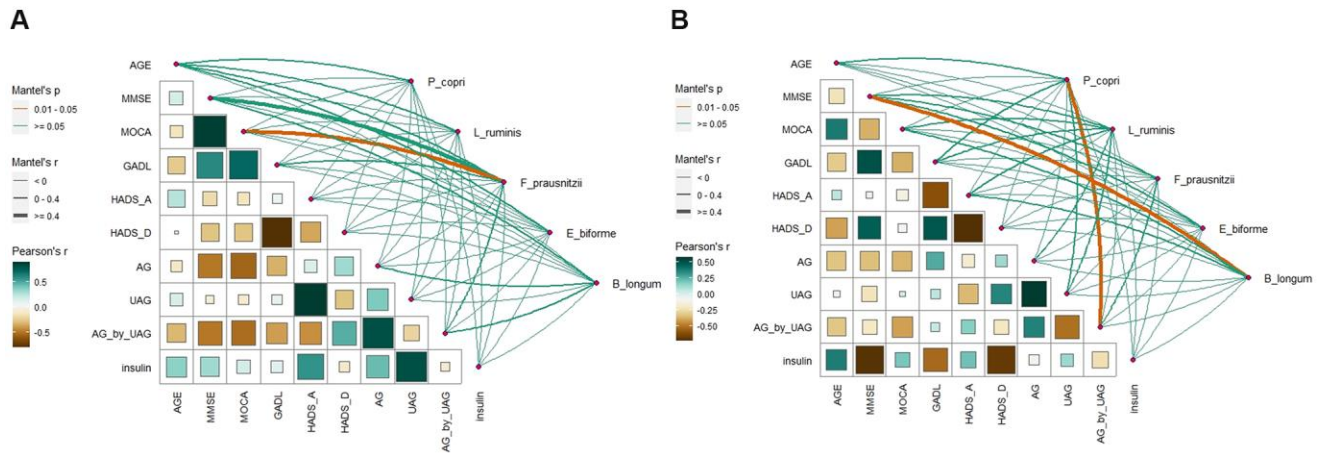

**Supplementary Figure 3. Mantel test between influential species in beta diversity and clinical scores and ghrelin levels. (A) Dementia Group. (B) Control Group. Brown color lines show a significant association ( $p < 0.05$ ).**

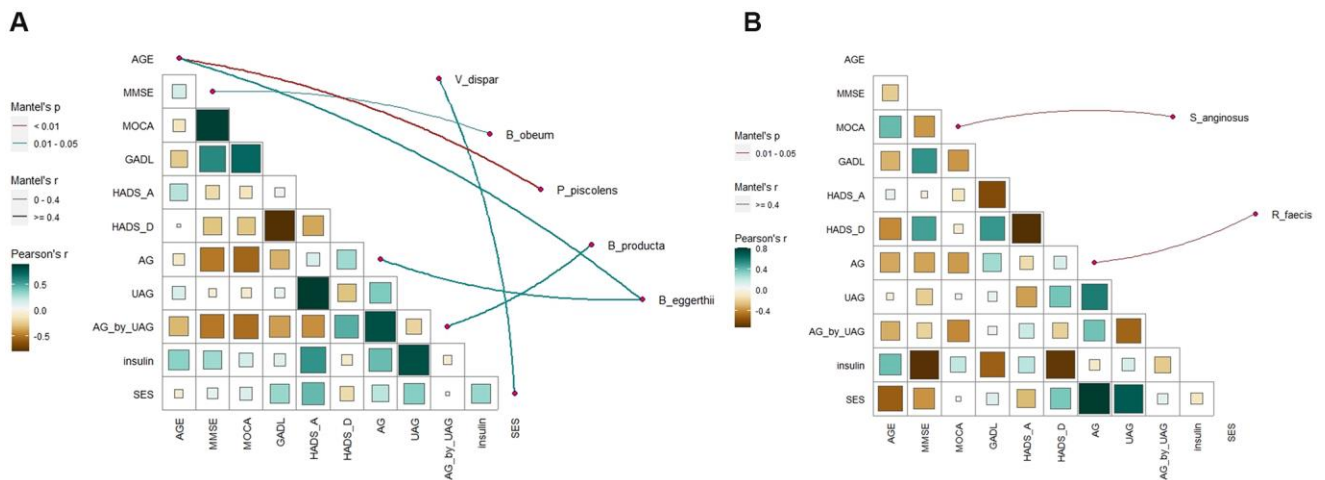

**Supplementary Figure 4. Mantel test between important species in neural network and clinical scores and ghrelin levels. (A) Dementia group. (B) Control Group. Brown color lines show a highly significant association ( $p < 0.01$ ), and dark cyan color lines show a significant association ( $p < 0.05$ ).**
